# Supplementary material for: Identification of Two Novel Members of the Tentative Genus Wukipolyomavirus in Wild Rodents
Source: PubMed Central journal article supplement (PMC4608572; doi:10.1371/journal.pone.0140916), 2015-10-16
Supplement: pone.0140916.s003.pdf [file pone.0140916.s003.pdf]

**S1 Table. Primers used to detect, amplify and characterize BVPyV and CVPyV genomes.**

| Primer designation                            | Sequence (5'-3')                 |
|-----------------------------------------------|----------------------------------|
| <b>Diagnostic PCR primers</b>                 |                                  |
| BVPyV -T-R3                                   | CTGGAAGGTCTCATAAGTTAAAG          |
| BVPyV -T-D3                                   | CTGGCGAAACTGCTAGACAG             |
| CVPyV -T-D4                                   | CTTCTGGAGGCTTCTGCTTTAC           |
| CVPyV -T-R4                                   | CATAGTTCAGGGGAATCCG              |
| <b>Genome amplification primers</b>           |                                  |
| BVPyV -D1                                     | CTTTCCCCTAACAAATCAAGAAG          |
| BVPyV -R1                                     | CTTAATATCAATGTTCCAGCTGACAAG      |
| CVPyV -D1                                     | GTTGTTTTTGAGGATGTGAAGGGAC        |
| CVPyV -R1                                     | CATAAATTGGTCTATTGCAACACCTAG      |
| <b>Sequencing primers</b>                     |                                  |
| BVPyV -Tag-R1                                 | GAGTTGCTTGAGAGTTGGGCATTG         |
| BVPyV -Tag-R2                                 | GCTTCGGATCTGCTCAGGGTTC           |
| BVPyV -VP1-R1                                 | CACCAGTGAGACCAAGCATGTCTG         |
| BVPyV -VP2-R1                                 | GCTACCAAAGTTACTAATTCCTC          |
| CVPyV -VP1-R1                                 | GTATAGGGATTCCCTTATAGTTCTC        |
| CVPyV -VP1-R2                                 | CAATTCGACACCATCATCACTG           |
| CVPyV -VP2-R1                                 | GCTGCACAGTTGGTATGTATGACAAG       |
| CVPyV -Tag-R1                                 | GAATCAGCATTAAAGTGCCTGCTTGC       |
| CVPyV -Tag-R2                                 | GCATCCCATGCATTGCACAGCCTG         |
| <b>VP1 gene amplification primers</b>         |                                  |
| BVPyV -ATG                                    | CGTCTAGATGCGCCGGTCGAGAGCACCTTCG  |
| BVPyV -Stop                                   | CGTCTAGTTATGTGTTGAATAAGGGCTGAG   |
| CVPyV -ATG                                    | GCTCTAGAATGCGCCGGTCGAGAGCACCGTGC |
| CVPyV -Stop                                   | GCTCTAGATTATGTATTAAGAGGGGCTGGG   |
| <b>Polyoma nested PCR primers<sup>a</sup></b> |                                  |
| T-1f                                          | GATGTTTCCTTTCTARRTTNAC           |
| T-1r                                          | GCAAAGATCAAAAAGCATHTGYCA         |
| T-2f                                          | AAATGATCTCTCAAGTTATCNARRTT       |
| T-2r                                          | AAAGGTCCAGTTAATAGTGGNAARAC       |

<sup>a</sup>Johne R, Enderlein D, Nieper H, Müller H. Novel polyomavirus detected in the feces of a chimpanzee by nested broad-spectrum PCR. *J Virol*, 2005;79(6):3883-3887.
