# Supplementary material for: Identification of Two Novel Members of the Tentative Genus Wukipolyomavirus in Wild Rodents
Source: PubMed Central journal article supplement (PMC4608572; doi:10.1371/journal.pone.0140916), 2015-10-16
Supplement: pone.0140916.s004.pdf [file pone.0140916.s004.pdf]

**S2 Table. Vole trapping site information and genome characterization of BVPyV and CVPyV.**

|                                      | BVPyV                                              |                                                    |                                                    |                                                    |                                                    | CVPyV                                              |                                                    |
|--------------------------------------|----------------------------------------------------|----------------------------------------------------|----------------------------------------------------|----------------------------------------------------|----------------------------------------------------|----------------------------------------------------|----------------------------------------------------|
| Sample number                        | KS/14/281                                          | KS/14/289                                          | KS/14/328                                          | KS/14/336                                          | KS/13/999                                          | KS/13/947                                          | KS/13/980                                          |
| GenBank acc. no.                     | KR612368                                           | KR612369                                           | KR612370                                           | KR612371                                           | KR612372                                           | KR612373                                           | KR612374                                           |
| Trapping site                        | Crailsheim,<br>Baden-<br>Wuerttemberg              | Crailsheim,<br>Baden-<br>Wuerttemberg              | Crailsheim,<br>Baden-<br>Wuerttemberg              | Crailsheim,<br>Baden-<br>Wuerttemberg              | Gotha,<br>Thuringia                                | Jeesser,<br>Mecklenburg-<br>Western<br>Pomerania   | Gotha,<br>Thuringia                                |
| Trapping date                        | 15.08.2013                                         | 01.10.2013                                         | 14.08.2013                                         | 15.08.2013                                         | 30.09.2012                                         | 04.10.2013                                         | 22.09.2012                                         |
| <b>Genome length</b>                 | <b>5032 bp</b>                                     | <b>5032 bp</b>                                     | <b>5032 bp</b>                                     | <b>5031 bp</b>                                     | <b>5011 bp</b>                                     | <b>5024 bp</b>                                     | <b>5024 bp</b>                                     |
| VP1 ORF length, (genome positions)   | 1062 bp<br>(1085-2146)                             | 1062 bp<br>(1085-2146)                             | 1062 bp<br>(1085-2146)                             | 1062 bp<br>(1085-2146)                             | 1062 bp<br>(1085-2146)                             | 1065 bp<br>(1081-2145)                             | 1065 bp (1081-2145)                                |
| VP1 protein length, aa               | 353                                                | 353                                                | 353                                                | 353                                                | 353                                                | 354                                                | 354                                                |
| VP2 ORF length, (genome positions)   | 1059 bp<br>(57-1115)                               | 1059 bp<br>(57-1115)                               | 1059 bp<br>(57-1115)                               | 1059 bp<br>(57-1115)                               | 1059 bp<br>(57-1115)                               | 1155 bp<br>(57-1211)                               | 1155 bp<br>(57-1211)                               |
| VP2 protein length, aa               | 352                                                | 352                                                | 352                                                | 352                                                | 352                                                | 384                                                | 384                                                |
| VP3 ORF length, (genome positions)   | 717 bp<br>(399-1115)                               | 717 bp<br>(399-1115)                               | 717 bp<br>(399-1115)                               | 717 bp<br>(399-1115)                               | 717 bp<br>(399-1115)                               | 816 bp<br>(396-1211)                               | 816 bp<br>(396-1211)                               |
| VP3 protein length, aa               | 238                                                | 238                                                | 238                                                | 238                                                | 238                                                | 271                                                | 271                                                |
| S Tag ORF length, (genome positions) | 648 bp<br>3927-4574                                | 648 bp<br>3927-4574                                | 648 bp<br>3927-4574                                | 648 bp<br>3926-4573                                | 648 bp<br>3928-4575                                | 570bp<br>4005-4574)                                | 570bp<br>4005-4574                                 |
| S Tag length, aa                     | 215                                                | 215                                                | 215                                                | 215                                                | 215                                                | 189                                                | 189                                                |
| L Tag ORF length, (genome positions) | 1956 bp<br>(2192-3686,<br>3792-4001,<br>4324-4574) | 1956 bp<br>(2192-3686,<br>3792-4001,<br>4324-4574) | 1956 bp<br>(2192-3686,<br>3792-4001,<br>4324-4574) | 1956 bp<br>(2192-3686,<br>3791-4000,<br>4323-4573) | 1953 bp<br>(2196-3687,<br>3793-4002,<br>4325-4575) | 1929 bp<br>(2208-3831,<br>3949-4002,<br>4324-4574) | 1929 bp<br>(2208-3831,<br>3949-4002,<br>4324-4574) |
| L Tag Donor site 1                   | <b>caggtacac</b>                                   | <b>caggtacac</b>                                   | <b>caggtacac</b>                                   | <b>caggtacac</b>                                   | <b>caggtacac</b>                                   | <b>caggtacac</b>                                   | <b>caggtacac</b>                                   |
| L Tag Acceptor site 1                | <b>tttgttttttaggt</b>                              | <b>tttgttttttaggt</b>                              | <b>tttgttttttaggt</b>                              | <b>tttgttttttaggt</b>                              | <b>tttgttttttaggt</b>                              | <b>tcttttttttaggt</b>                              | <b>tcttttttttaggt</b>                              |
| L Tag Donor site 2                   | <b>atgggaaga</b>                                   | <b>atgggaaga</b>                                   | <b>atgggaaga</b>                                   | <b>atgggaaga</b>                                   | <b>atgggaaga</b>                                   | <b>atgggaaga</b>                                   | <b>atgggaaga</b>                                   |
| L Tag Acceptor site 2                | <b>ctccctttccagac</b>                              | <b>ctccctttccagac</b>                              | <b>ctccctttccagac</b>                              | <b>ctccctttccagac</b>                              | <b>ctccctttccagac</b>                              | <b>tattattcacagga</b>                              | <b>tattattcacagga</b>                              |
| L Tag length, aa                     | 651                                                | 651                                                | 651                                                | 651                                                | 650                                                | 642                                                | 642                                                |
| X-ORF                                | 4835-4996                                          | 4835-4996                                          | 4835-4996                                          | 4834-4995                                          | 4889-66                                            | 4534-4959                                          | 4534-4959                                          |
| Putative protein length, aa          | 53                                                 | 53                                                 | 53                                                 | 53                                                 | 62                                                 | 141                                                | 141                                                |
